# Supplementary material for: A contrast agent recognizing activated platelets reveals murine cerebral malaria pathology undetectable by conventional MRI
Source: JCI journal article supplement (doi:10.1172/jci33314), 2008-02-01
Supplement: sd1 [file 1]

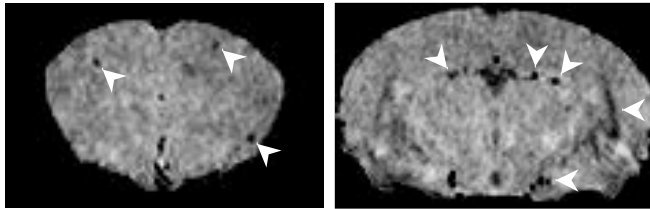

**Supplementary Figure 1:** Coronal slices at Bregma +1.7 (left) and Bregma -1.7 (right) from an CM animal at day 5. Note that there is much less retention of agent than at day 6 (Figure 3A), but isolated hypointensities and the occasional vessel could be detected (arrow heads).

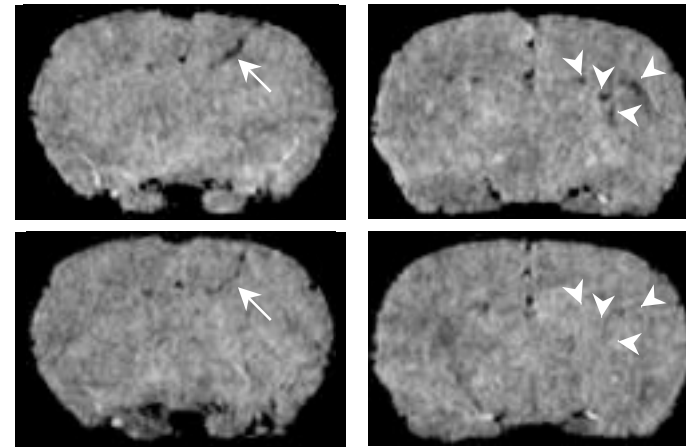

**Supplementary Figure 2:** Coronal slices at Bregma +0.5 (left) and Bregma -1.5 (right) from an animal injected with 1µg TNF. Top row: 24h after TNF and at 1.5-2.5h (2h = midpoint) post LIBS-MPIO. Bottom row at 10-11h (10.5h = midpoint) post LIBS-MPIO, which show marked reduction (arrow) or elimination (arrowheads) of signal.
